# Supplementary material for: Potential upstream lncRNA–miRNA–mRNA regulatory network of the ferroptosis-related gene SLC7A11 in renal cell carcinoma
Source: PubMed Central journal article supplement — Transl Androl Urol. 2023 Jan 11;12(1):33–57. doi: 10.21037/tau-22-663 (PMC9906110; doi:10.21037/tau-22-663), 2023-01-11
Supplement: tau-12-01-33-supplementary.pdf [file tau-12-01-33-supplementary.pdf]

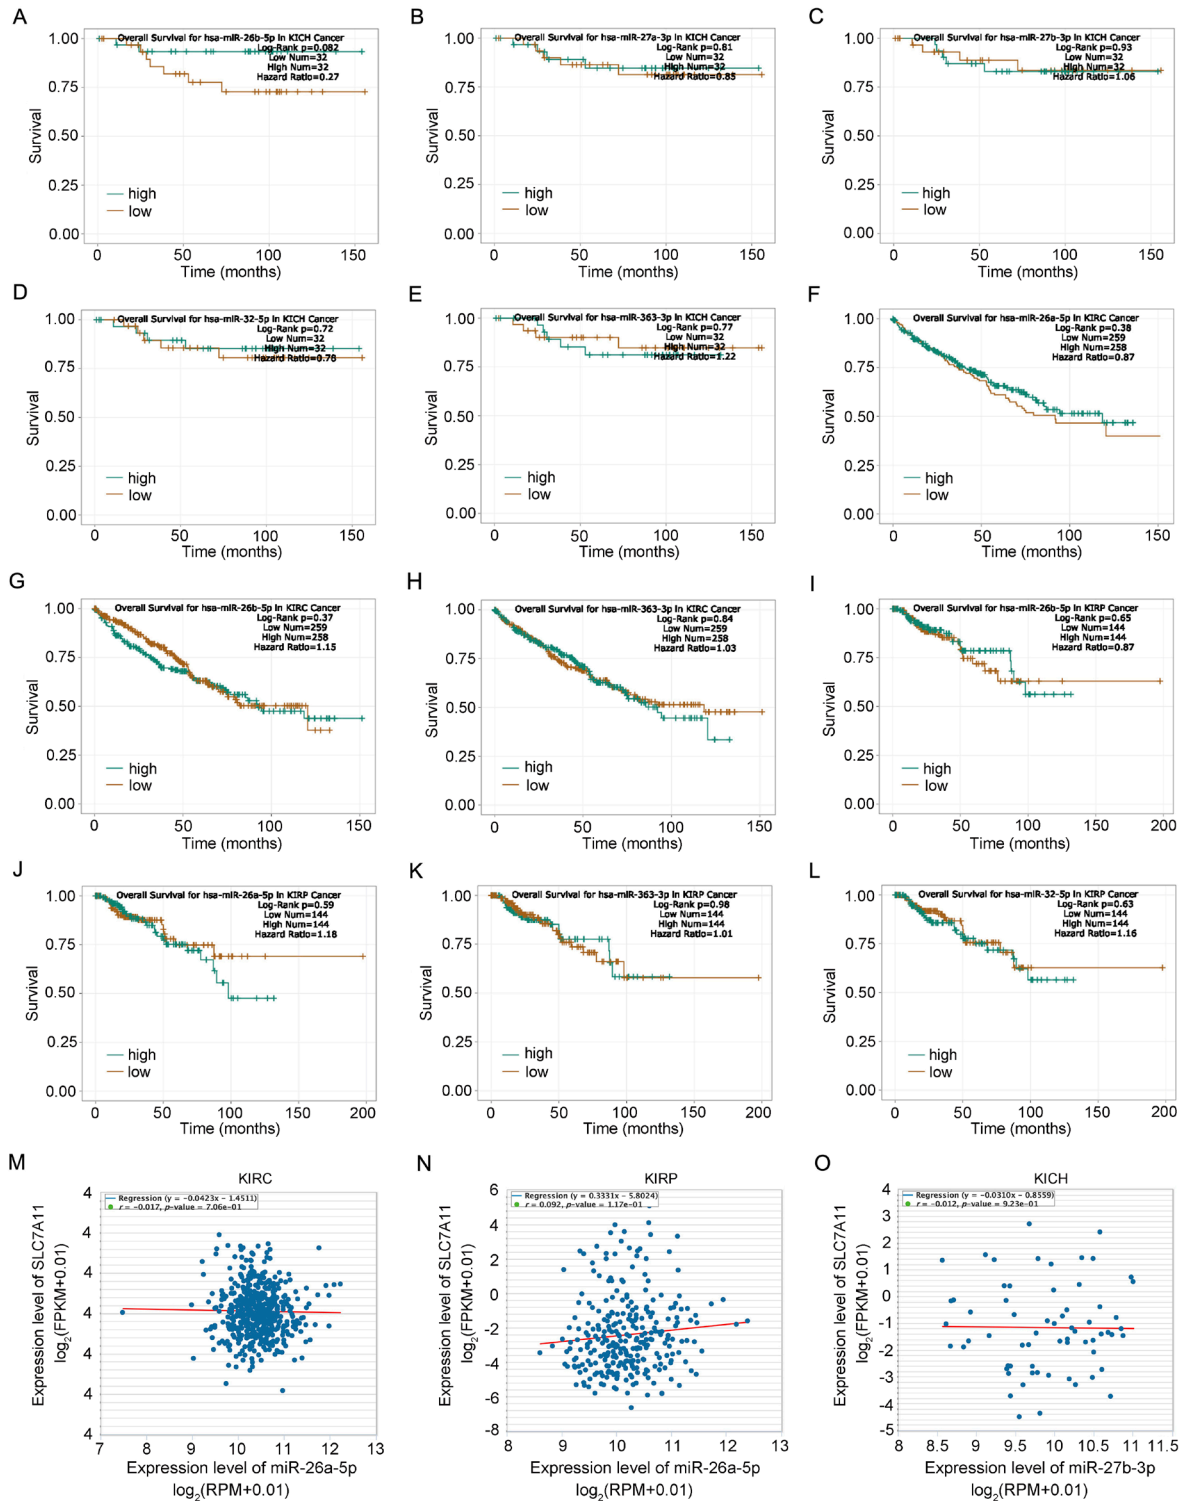

**Figure S1** (A) The overall survival for miR-26b-5p in KICH. (B) The overall survival for miR-27a-3p in KICH. (C) The overall survival for miR-27b-3p in KICH. (D) The overall survival for miR-32-5p in KICH. (E) The overall survival for miR-363-3p in KICH. (F) The overall survival for miR-26a-5p in KIRC. (G) The overall survival for miR-26b-5p in KIRC. (H) The overall survival for miR-363-3p in KIRC. (I) The overall survival for miR-26b-5p in KIRC. (J) The overall survival for miR-26a-5p in KIRC. (K) The overall survival for miR-363-3p in KIRC. (L) The overall survival for miR-32-5p in KIRC. (M) The correlation of miR-26a-5p with SLC7A11 expression in KIRC. (N) The correlation of miR-26a-5p with SLC7A11 expression in KIRC. (O) The correlation of miR-27b-3p with SLC7A11 expression in KICH.
